# Supplementary material for: Kernel Density Estimation of Electromyographic Signals and Ensemble Learning for Highly Accurate Classification of a Large Set of Hand/Wrist Motions
Source: Frontiers journal article supplement (doi:10.3389/fnins.2022.796711), 2022-03-09
Supplement: Data_Sheet_1.PDF [file Data_Sheet_1.PDF]

## *Supplementary Material*

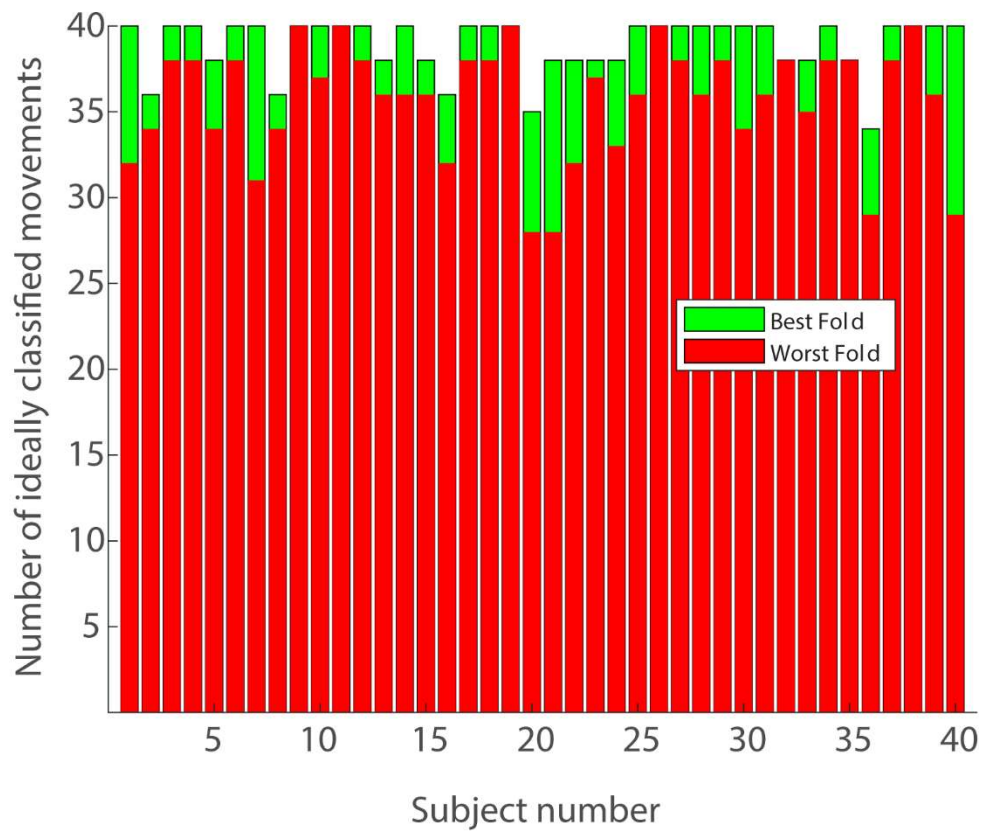

**Supplementary Figure 1.** Number of ideally classified movements per each subject for best and worst scenarios in the three analyzed folds.

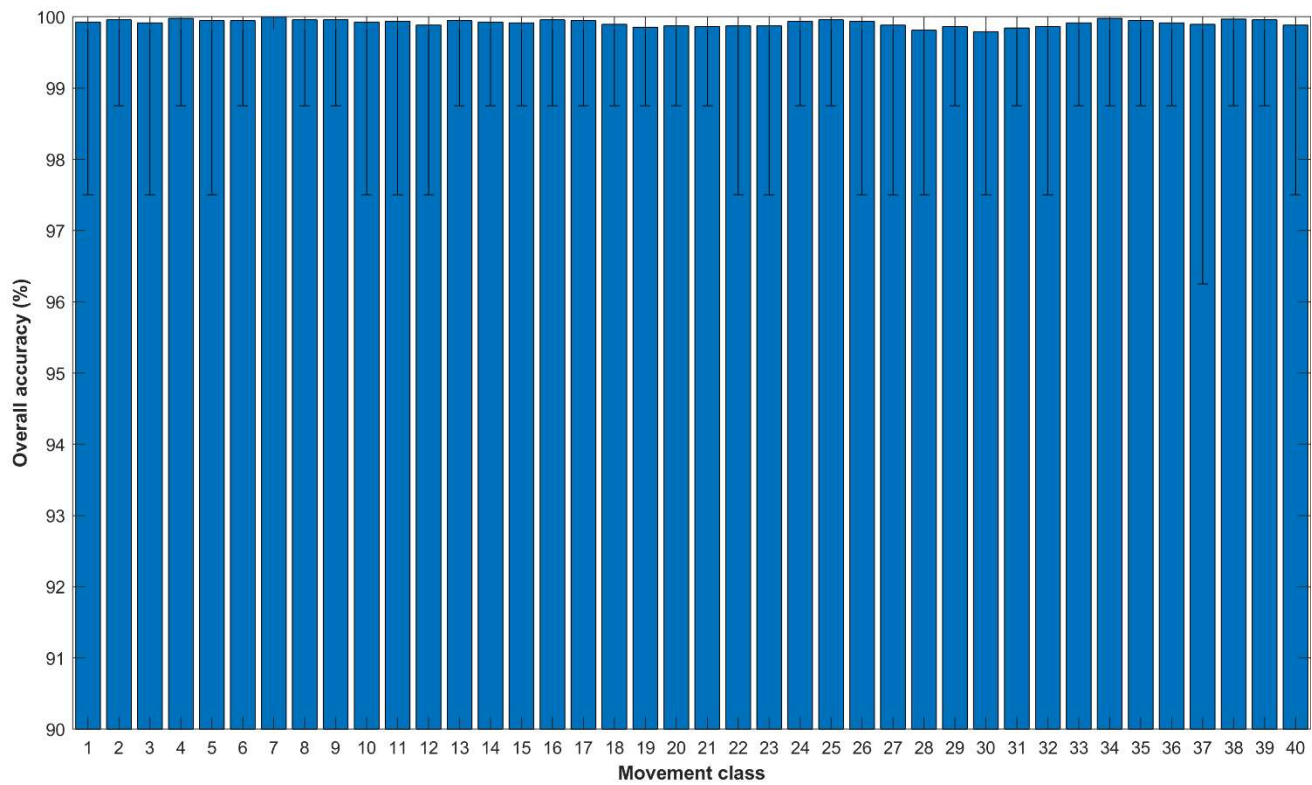

**Supplementary Figure 2.** The performance of the proposed classification system for each movement of the entire intact subjects. The error bar shows the minimum and maximum classification accuracy on the test folds.

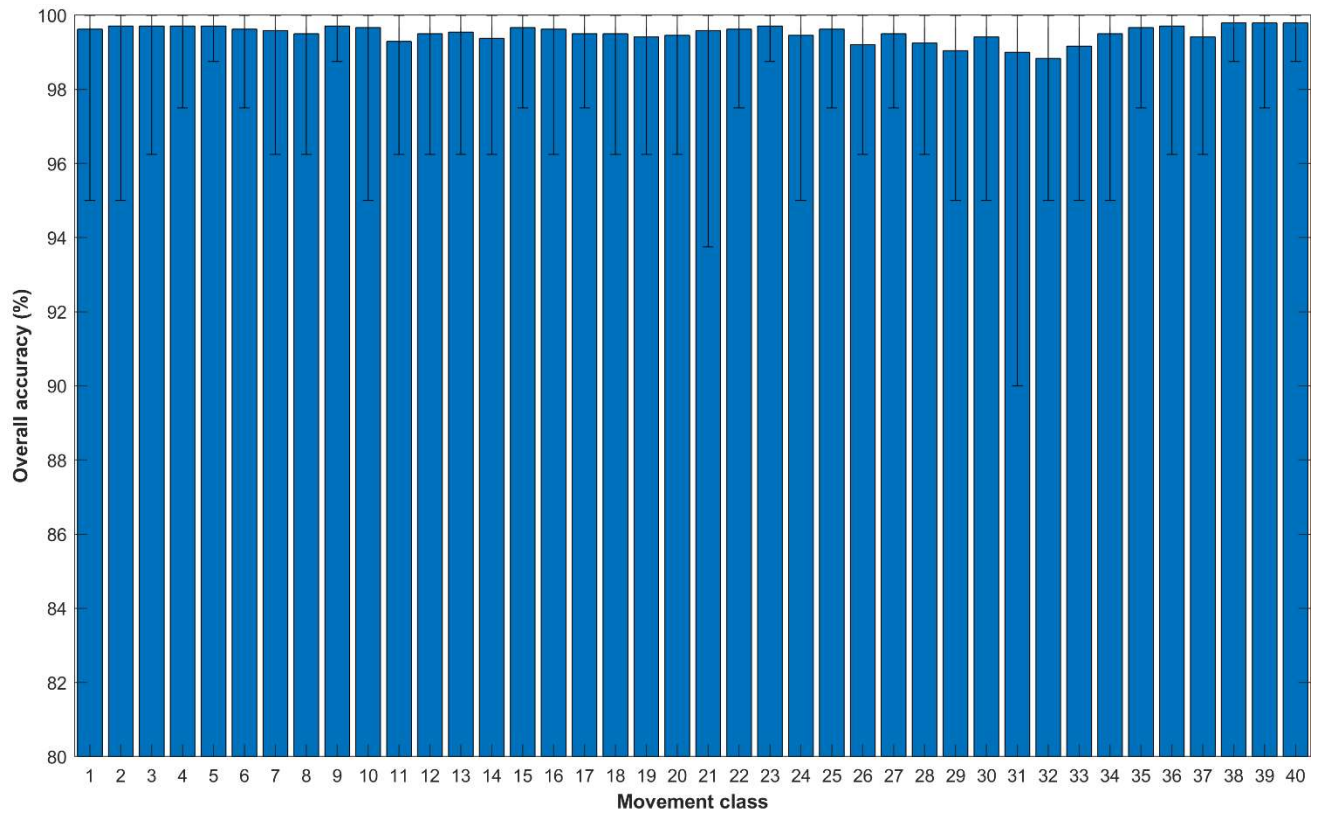

**Supplementary Figure 3.** The performance of the proposed classification system for each movement of the entire amputees. The error bar shows the minimum and maximum classification accuracy on the test folds.

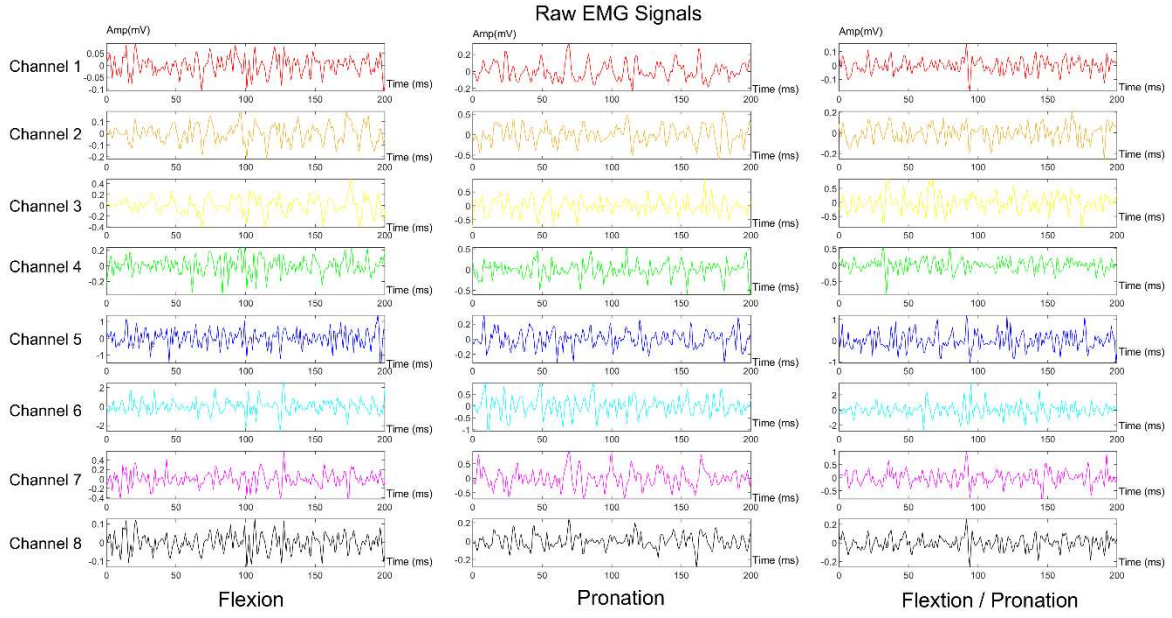

**Supplementary Figure 4.** A sample raw signal array for three movements of Ameri's dataset.

**Supplementary Table 1.** The performance of the proposed ensemble classification system for each intact subject for the detection of 40 movements; shown in mean $\pm$ sd of the 40 movements by 3 analyzed folds.

| Subject number | (micro) F-Score | (macro) F-Score | (macro) Precision | (macro) Recall |
|----------------|-----------------|-----------------|-------------------|----------------|
| 1              | 98.3 $\pm$ 2.9  | 98.2 $\pm$ 3.1  | 98.9 $\pm$ 1.9    | 98.3 $\pm$ 2.9 |
| 2              | 96.7 $\pm$ 0.7  | 96.4 $\pm$ 0.8  | 97.8 $\pm$ 0.5    | 96.7 $\pm$ 0.7 |
| 3              | 99.2 $\pm$ 0.7  | 99.1 $\pm$ 0.8  | 99.4 $\pm$ 0.5    | 99.4 $\pm$ 0.7 |
| 4              | 99.6 $\pm$ 0.7  | 99.6 $\pm$ 0.8  | 99.7 $\pm$ 0.5    | 99.6 $\pm$ 0.7 |
| 5              | 96.7 $\pm$ 1.9  | 96.5 $\pm$ 2.0  | 97.5 $\pm$ 1.7    | 96.7 $\pm$ 1.9 |
| 6              | 99.2 $\pm$ 0.7  | 99.1 $\pm$ 0.8  | 99.4 $\pm$ 0.5    | 99.2 $\pm$ 0.7 |
| 7              | 96.7 $\pm$ 3.1  | 96.5 $\pm$ 3.3  | 97.6 $\pm$ 2.3    | 96.7 $\pm$ 3.1 |
| 8              | 96.7 $\pm$ 1.4  | 96.6 $\pm$ 1.3  | 98.1 $\pm$ 0.4    | 96.7 $\pm$ 1.4 |

|    |          |          |          |          |
|----|----------|----------|----------|----------|
| 9  | 100.0    | 100.0    | 100.0    | 100.0    |
| 10 | 99.2±1.4 | 99.1±1.5 | 99.3±1.2 | 99.2±1.4 |
| 11 | 100.0    | 100.0    | 100.0    | 100.0    |
| 12 | 99.6±0.7 | 99.6±0.8 | 99.7±0.5 | 99.6±0.7 |
| 13 | 98.3±0.7 | 98.2±0.8 | 98.9±0.5 | 98.3±0.7 |
| 14 | 98.8±1.3 | 98.7±1.3 | 99.2±0.8 | 98.8±1.3 |
| 15 | 98.3±0.7 | 98.2±0.8 | 98.9±0.5 | 98.3±0.7 |
| 16 | 96.3±1.3 | 96.0±1.3 | 97.4±0.9 | 96.3±1.3 |
| 17 | 99.6±0.7 | 99.6±0.8 | 99.7±0.5 | 99.6±0.7 |
| 18 | 99.6±0.7 | 99.6±0.8 | 99.7±0.5 | 99.6±0.7 |
| 19 | 100.0    | 100.0    | 100.0    | 100.0    |
| 20 | 94.2±2.6 | 94.0±2.7 | 96.0±1.6 | 94.2±2.6 |
| 21 | 96.7±3.6 | 96.4±3.8 | 97.8±2.4 | 96.7±3.6 |
| 22 | 97.1±1.9 | 96.9±2.0 | 98.1±1.3 | 97.1±1.9 |
| 23 | 98.3±0.7 | 98.3±0.7 | 99.0±0.2 | 98.3±0.7 |
| 24 | 97.5±2.2 | 97.4±2.3 | 98.2±1.7 | 97.5±2.2 |
| 25 | 98.8±1.3 | 98.7±1.3 | 99.2±0.8 | 98.8±1.3 |
| 26 | 100.0    | 100.0    | 100.0    | 100.0    |
| 27 | 99.2±0.7 | 99.1±0.8 | 99.4±0.5 | 99.2±0.7 |
| 28 | 98.3±1.4 | 98.2±1.5 | 98.9±1.0 | 98.3±1.4 |
| 29 | 99.6±0.7 | 99.6±0.8 | 99.7±0.5 | 99.6±0.7 |

|    |          |          |          |          |
|----|----------|----------|----------|----------|
| 30 | 98.3±1.9 | 98.2±2.0 | 98.9±1.3 | 98.3±1.9 |
| 31 | 98.8±1.3 | 98.7±1.3 | 99.2±0.8 | 98.8±1.3 |
| 32 | 98.8±0.0 | 98.7±0.0 | 99.2±0.0 | 98.8±0.0 |
| 33 | 97.9±1.4 | 97.8±1.4 | 98.8±0.7 | 97.9±1.4 |
| 34 | 99.2±0.7 | 99.1±0.8 | 99.4±0.5 | 99.2±0.7 |
| 35 | 98.8±0.0 | 98.7±0.0 | 99.2±0.0 | 98.8±0.0 |
| 36 | 94.6±1.9 | 94.3±2.0 | 96.3±1.5 | 94.6±1.9 |
| 37 | 99.6±0.7 | 99.6±0.8 | 99.7±0.5 | 99.6±0.7 |
| 38 | 100.0    | 100.0    | 100.0    | 100.0    |
| 39 | 98.8±1.3 | 98.7±1.3 | 99.2±0.8 | 98.8±1.3 |
| 40 | 96.3±3.8 | 96.1±3.9 | 97.8±2.3 | 96.3±3.8 |

For each subject, the mean and standard deviation of each criterion was obtained by considering 120 elements (40 movements by 3 analyzed folds).

**Supplementary Table 2.** The performance of the proposed ensemble classification system for each amputee subject for the detection of 40 movements; shown in mean±sd of the 40 movements by 3 analyzed folds.

| <b>Subject number</b> | <b>(micro) F-Score</b> | <b>(macro) F-Score</b> | <b>(macro) Precision</b> | <b>(macro) Recall</b> |
|-----------------------|------------------------|------------------------|--------------------------|-----------------------|
| 2                     | 96.6±2.8               | NaN                    | NaN                      | 96.7±2.8              |
| 3                     | 87.9±0.7               | NaN                    | NaN                      | 87.9±0.7              |
| 4                     | 95.8±1.4               | NaN                    | 96.5±1.6                 | 95.8±1.5              |
| 5                     | 91.6±0.7               | NaN                    | NaN                      | 91.6±0.7              |

|    |           |          |           |          |
|----|-----------|----------|-----------|----------|
| 6  | 97.1±3.4  | NaN      | NaN       | 97.1±3.1 |
| 7  | 68.7±10.0 | NaN      | NaN       | 68.7±10. |
| 8  | 98.3±2.6  | 98.2±0.7 | 98.8±0.5  | 98.3±0.7 |
| 9  | 97.5±1.2  | 97.3±1.3 | 98.3 ±0.8 | 97.5±5.0 |
| 10 | 74.6±5.1  | NaN      | NaN       | 74.5±1.2 |
| 11 | 94.2±1.9  | 93.8±2.1 | 96.7±1.5  | 94.1±2.0 |

NaN: not a number, when at least one of the movements is completely misclassified in a fold. For each subject, the mean and standard deviation of each criterion was obtained by considering 120 elements (40 movements by 3 analyzed folds).

**Supplementary Table 3.** The performance of the proposed features with the XGBoost and LDA classifiers (in percent) for each intact subject for the detection of 9 simultaneous movements; shown in mean±sd of the 9 movements in 4 analyzed folds.

|                       | <b>XGBoost</b>         |                        |                          |                       | <b>LDA</b>             |                        |                          |                       |
|-----------------------|------------------------|------------------------|--------------------------|-----------------------|------------------------|------------------------|--------------------------|-----------------------|
| <b>Subject number</b> | <b>(micro) F-Score</b> | <b>(macro) F-Score</b> | <b>(macro) Precision</b> | <b>(macro) Recall</b> | <b>(micro) F-Score</b> | <b>(macro) F-Score</b> | <b>(macro) Precision</b> | <b>(macro) Recall</b> |
| 1                     | 99.55±0.22             | 99.55±0.22             | 99.46±0.25               | 99.49±0.26            | 93.39±1.12             | 92.43±1.50             | 93.00±0.20               | 92.07±2.73            |
| 2                     | 99.01±0.52             | 98.86±0.56             | 98.87±0.57               | 98.86±0.55            | 92.18±0.67             | 90.88±0.85             | 91.22±0.82               | 90.94±0.81            |
| 3                     | 98.94±0.56             | 98.79±0.65             | 98.76±0.62               | 98.84±0.68            | 92.41±0.78             | 91.20±0.74             | 91.40±0.78               | 91.34±0.60            |
| 4                     | 98.35±0.48             | 98.08±0.62             | 98.08±0.66               | 98.09±0.53            | 90.46±0.49             | 88.95±0.48             | 89.53±0.60               | 89.13±0.59            |
| 5                     | 97.87±0.41             | 97.48±0.53             | 97.56±0.50               | 97.43±0.58            | 89.95±1.02             | 88.32±1.10             | 89.09±1.11               | 86.23±5.02            |
| 6                     | 98.43±0.38             | 98.16±0.39             | 98.17±0.38               | 98.19±0.40            | 90.37±1.05             | 91.32±4.60             | 89.48±1.39               | 89.00±1.46            |
| 7                     | 98.59±0.37             | 98.31±0.42             | 98.32±0.14               | 98.33±0.41            | 90.50±1.12             | 88.90±1.46             | 89.59±1.45               | 89.03±1.33            |
| 8                     | 99.61±0.33             | 99.57±0.36             | 99.57±0.39               | 99.57±0.34            | 92.67±0.85             | 91.57±0.91             | 91.91±0.84               | 91.61±1.10            |
| 9                     | 98.97±0.31             | 98.88±0.40             | 98.83±0.40               | 98.95±0.42            | 92.76±0.93             | 91.73±0.95             | 92.01±0.94               | 91.80±1.03            |

# Supplementary Material

|    |            |            |            |            |            |            |            |            |
|----|------------|------------|------------|------------|------------|------------|------------|------------|
| 10 | 99.34±0.26 | 99.23±0.36 | 99.30±0.29 | 99.18±0.50 | 92.93±0.56 | 91.88±0.89 | 92.16±0.76 | 97.87±0.90 |
| 11 | 98.30±0.03 | 98.01±0.46 | 98.04±0.40 | 98.03±0.50 | 90.91±0.72 | 89.46±0.72 | 89.67±0.72 | 89.49±0.64 |
| 12 | 99.52±0.19 | 99.47±0.22 | 99.45±0.20 | 99.49±0.24 | 95.55±0.66 | 94.75±0.77 | 94.80±0.80 | 94.91±0.74 |
| 13 | 97.76±0.73 | 97.43±0.86 | 97.44±0.91 | 97.47±0.77 | 90.46±1.00 | 88.79±1.02 | 89.42±1.17 | 88.97±1.02 |
| 14 | 97.39±0.41 | 97.00±0.40 | 97.17±0.57 | 96.92±0.32 | 85.03±1.23 | 81.89±1.03 | 83.11±1.09 | 82.64±0.95 |
| 15 | 99.80±0.26 | 99.09±0.20 | 99.09±0.19 | 99.09±0.21 | 91.55±0.47 | 90.32±0.60 | 91.13±0.88 | 90.30±0.61 |
| 16 | 98.64±0.59 | 98.41±0.68 | 98.44±0.65 | 98.43±0.69 | 88.38±2.00 | 86.42±2.39 | 87.46±1.78 | 86.63±2.35 |
| 17 | 99.39±0.36 | 99.28±0.43 | 99.30±0.40 | 99.26±0.45 | 87.93±1.31 | 95.95±1.32 | 86.34±1.41 | 86.09±1.22 |
